# Supplementary material
Source: MDPI journal article supplement (https://www.mdpi.com/2073-4344/12/10/1168)
Supplement: s1 [file s1]

# Mononuclear oxidovanadium(IV) complexes with BIAN-ligands: synthesis and catalytic activity in the oxidation of hydrocarbons and alcohols with peroxides

Iakov S. Fomenko <sup>1</sup>, Marko I. Gongola <sup>2</sup>, Lidia S. Shul'pina <sup>3</sup>, Nikolay S. Ikonnikov <sup>3</sup>, Andrey Yu. Komarovskikh <sup>1</sup>, Vladimir A. Nadolinny <sup>1</sup>, Yuriy N. Kozlov <sup>4,5</sup>, Artem L. Gushchin <sup>1,\*</sup> and Georgiy B. Shul'pin <sup>4,5,\*</sup>

<sup>1</sup> Nikolaev Institute of Inorganic Chemistry, Siberian Branch of Russian Academy of Sciences, Prosp. Acad. Lavrentieva, dom 3, 630090 Novosibirsk, Russia

<sup>2</sup> Chemistry Department Novosibirsk State University, 1 Pirogova Str., 630090 Novosibirsk, Russia

<sup>3</sup> A.N. Nesmeyanov Institute of Organoelement Compounds, Russian Academy of Sciences, Ulitsa Vavilova, dom 28, 119991 Moscow, Russia

<sup>4</sup> N.N. Semenov Federal Research Center for Chemical Physics, Russian Academy of Sciences, Ulitsa Kosygina 4, 119991 Moscow, Russia

<sup>5</sup> Chair of Chemistry and Physics, Plekhanov Russian University of Economics, Stremyanniy Pereulok, dom 36, 117997 Moscow, Russia

\* Correspondence: gbsh@mail.ru or gushchin@niic.nsc.ru (A.L.G.); shulpin@chph.ras.ru (G.B.S.)

## Table of contents

**Figure S1.** UV-spectrum of **1** in the CH<sub>3</sub>CN

**Figure S2.** UV-spectrum of **2** in the CH<sub>3</sub>CN

**Table S1.** Optimized coordinates for complex **1**

**Table S2.** Optimized coordinates for complex **2**

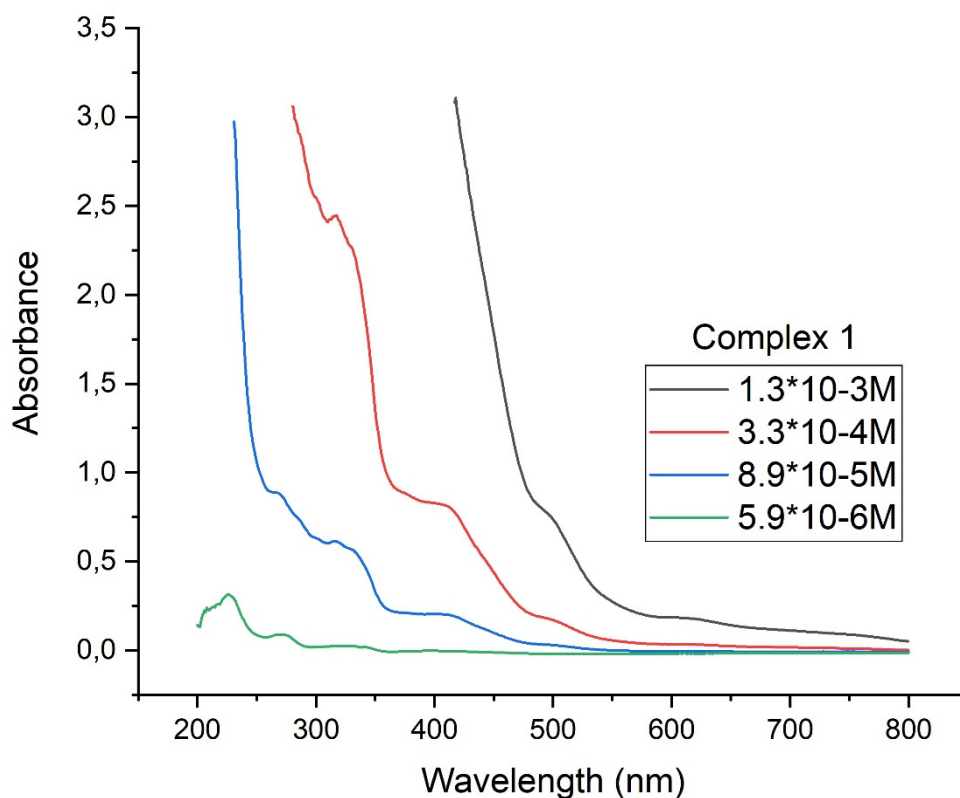

**Figure S1.** UV-spectrum of **1** in the CH<sub>3</sub>CN

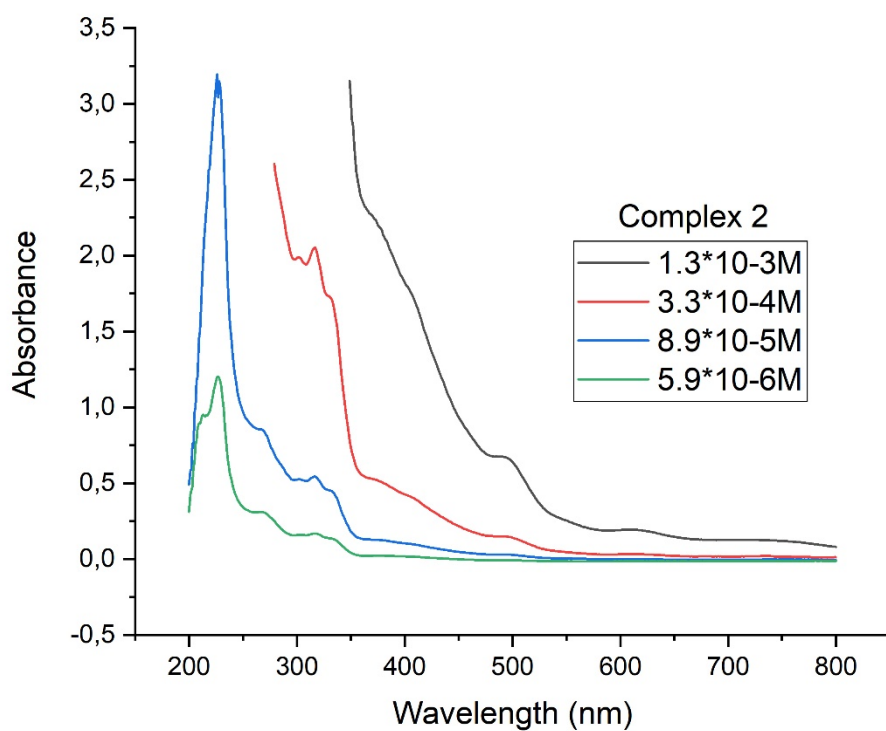

**Figure S2.** UV-spectrum of **2** in the  $\text{CH}_3\text{CN}$

**Table S1**

Optimized coordinates for complex **1**

|   |             |             |             |
|---|-------------|-------------|-------------|
| C | 1.49949717  | 0.28498388  | 1.68212075  |
| C | 0.82814364  | -0.58158546 | 2.53533486  |
| C | 1.39600563  | -1.85453682 | 2.79517774  |
| C | 2.59598527  | -2.26494038 | 2.22693550  |
| C | 5.16449755  | -0.68482962 | -0.06613558 |
| C | 4.56939671  | 0.58023297  | -0.30097895 |
| C | 3.34234788  | 0.85775728  | 0.28803980  |
| C | 2.73127624  | -0.13550496 | 1.10547353  |
| C | 3.31286052  | -1.39763677 | 1.35562916  |
| C | 4.56571111  | -1.65332815 | 0.73111182  |
| H | -0.11365154 | -0.30577092 | 3.00665989  |
| H | 0.86948762  | -2.53102625 | 3.46904662  |
| H | 2.99805037  | -3.25318665 | 2.45588518  |

|   |             |             |             |
|---|-------------|-------------|-------------|
| H | 6.12939839  | -0.89900037 | -0.52660030 |
| H | 5.07956253  | 1.30701338  | -0.93085073 |
| C | 1.31859948  | 1.67845110  | 1.25951302  |
| H | 5.06091633  | -2.61315327 | 0.88785401  |
| C | 2.47997391  | 2.03917528  | 0.38767544  |
| N | 0.39700200  | 2.58232560  | 1.47031306  |
| N | 2.52719007  | 3.24574878  | -0.11952918 |
| C | 3.36485338  | 3.49307018  | -1.24979672 |
| C | 3.14239641  | 2.75925117  | -2.42771807 |
| C | 3.91949993  | 3.00151724  | -3.56041509 |
| C | 4.93882247  | 3.96662797  | -3.54812429 |
| C | 5.14463989  | 4.69330499  | -2.36009178 |
| C | 4.36230899  | 4.47951454  | -1.22596453 |
| H | 2.35495487  | 2.00372070  | -2.45513635 |
| H | 3.72638240  | 2.43013844  | -4.47078915 |
| H | -3.08291425 | 2.63994048  | 4.49855209  |
| H | 5.93082692  | 5.45044179  | -2.32444508 |
| H | 4.52549156  | 5.05918329  | -0.31897775 |
| C | -0.88396120 | 2.16880375  | 1.94542026  |
| C | -1.62756847 | 1.25187964  | 1.18344024  |
| C | -2.88765100 | 0.84099037  | 1.61834881  |
| C | -3.43473392 | 1.32190484  | 2.81840940  |
| C | -2.67942453 | 2.24773957  | 3.56257090  |
| C | -1.42715086 | 2.68456460  | 3.13224204  |
| H | -1.21786695 | 0.86872209  | 0.24746904  |
| H | -3.45518767 | 0.13223647  | 1.01176924  |
| H | -0.85899300 | 3.40722990  | 3.71549818  |
| C | 5.77996419  | 4.22862203  | -4.77234435 |

|    |             |            |             |
|----|-------------|------------|-------------|
| H  | 5.65325832  | 5.26361666 | -5.12334673 |
| H  | 6.84931812  | 4.09100356 | -4.55417174 |
| H  | 5.50776507  | 3.55472882 | -5.59445150 |
| C  | -4.79323502 | 0.86942710 | 3.29277269  |
| H  | -5.22564214 | 0.12503458 | 2.61262169  |
| H  | -4.73261478 | 0.42341174 | 4.29667613  |
| H  | -5.49116223 | 1.71739662 | 3.35925127  |
| V  | 1.22777828  | 4.56611678 | 1.02730309  |
| Cl | -0.73695225 | 5.62874640 | 1.71604579  |
| Cl | 1.95711343  | 6.48817315 | -0.08852802 |
| O  | -0.07297528 | 4.27987587 | -0.93738115 |
| H  | 0.28286596  | 3.77310930 | -1.69321537 |
| H  | -0.97033546 | 3.92367180 | -0.78653601 |
| O  | 2.14721256  | 4.58646759 | 2.34394862  |
| O  | -0.07297528 | 4.27987587 | -0.93738115 |
| H  | 0.28286596  | 3.77310930 | -1.69321537 |
| H  | -0.97033546 | 3.92367180 | -0.78653601 |
| O  | 2.14721256  | 4.58646759 | 2.34394862  |

**Table S2**

Optimized coordinates for complex **2**

|   |            |             |             |
|---|------------|-------------|-------------|
| C | 1.33367067 | 0.20249808  | 1.58707061  |
| C | 0.66296821 | -0.65339698 | 2.45204617  |
| C | 1.22499187 | -1.92723175 | 2.71743735  |
| C | 2.42107283 | -2.34592104 | 2.14797466  |
| C | 4.98403324 | -0.80747110 | -0.17868367 |
| C | 4.39374949 | 0.45715243  | -0.42624750 |
| C | 3.17060530 | 0.74775374  | 0.16473201  |

|   |             |             |             |
|---|-------------|-------------|-------------|
| C | 2.56232464  | -0.22702458 | 1.00721721  |
| C | 3.13958115  | -1.48877267 | 1.26826561  |
| C | 4.38441756  | -1.76093710 | 0.63509676  |
| H | -0.27704217 | -0.37041820 | 2.92157391  |
| H | 0.69555779  | -2.59848529 | 3.39396413  |
| H | 2.81787215  | -3.33569520 | 2.37914830  |
| H | 5.94218416  | -1.03497054 | -0.64639531 |
| H | 4.90365642  | 1.17465520  | -1.06692792 |
| C | 1.13195914  | 1.57279176  | 1.11002881  |
| H | 4.87201070  | -2.72366198 | 0.79718079  |
| C | 2.27611281  | 1.90558947  | 0.19109568  |
| N | 0.26040957  | 2.50561669  | 1.36083579  |
| N | 2.29269204  | 3.09034835  | -0.34410533 |
| C | 3.35999451  | 3.50236464  | -1.21221065 |
| C | 3.50412067  | 2.96707796  | -2.51186470 |
| C | 4.55859859  | 3.46724870  | -3.29535118 |
| C | 5.43191983  | 4.44782955  | -2.82286876 |
| C | 5.25655085  | 4.97558688  | -1.53870094 |
| C | 4.21031694  | 4.51472711  | -0.74200116 |
| H | 3.00479654  | 0.90352578  | -2.93594949 |
| H | 4.68520472  | 3.07432112  | -4.30649778 |
| H | -2.38071204 | 2.90539803  | 5.12220143  |
| H | 5.92309631  | 5.75218189  | -1.16173394 |
| H | 4.03981647  | 4.92732843  | 0.25238557  |
| C | -0.89965373 | 2.20636759  | 2.15308320  |
| C | -1.89055275 | 1.38658452  | 1.59177260  |
| C | -3.06175632 | 1.12007321  | 2.30102380  |
| C | -3.23637018 | 1.66964301  | 3.57497593  |

|    |             |            |             |
|----|-------------|------------|-------------|
| C  | -2.24090505 | 2.48130334 | 4.12587221  |
| C  | -1.05635745 | 2.77700062 | 3.43309703  |
| H  | -1.73993663 | 0.97231923 | 0.59405220  |
| H  | -3.83274007 | 0.48986068 | 1.85616350  |
| H  | 0.92803010  | 3.06178910 | 4.24610003  |
| H  | 6.23884077  | 4.81030193 | -3.46149176 |
| H  | -0.31030589 | 3.47131056 | -2.13374264 |
| H  | -1.38676496 | 3.07262939 | -1.11925212 |
| O  | 1.38281226  | 5.26808061 | 1.30401988  |
| H  | -4.14843023 | 1.46894224 | 4.13933490  |
| O  | -0.47531574 | 2.83443214 | -1.40084697 |
| Cl | 0.82559926  | 5.57085008 | -1.76885612 |
| Cl | -1.62861936 | 4.97496106 | 0.51736001  |
| V  | 0.62288256  | 4.33929064 | 0.23556063  |
| C  | 2.58696130  | 1.91228577 | -3.08070455 |
| H  | 1.59511532  | 1.92363791 | -2.61454586 |
| H  | 2.46378770  | 2.06073152 | -4.16116962 |
| C  | 0.01281979  | 3.64002571 | 4.04747534  |
| H  | 0.29552470  | 4.46207972 | 3.37413049  |
| H  | -0.33296977 | 4.06534528 | 4.99732663  |
